# Supplementary material
Source: ML conference proceedings conference paper supplement (https://openreview.net/forum?id=rEh8KTz9Ba)
Supplement: supplementary_material [file attachment]

# Supplementary Materials: “Rainmer: Learning Multi-view Representations for Comprehensive Image Deraining and Beyond”

Anonymous Authors

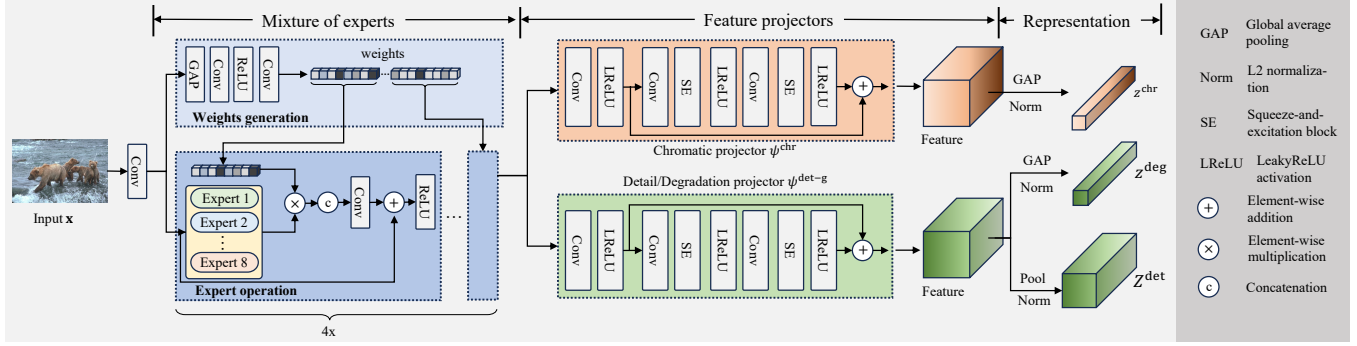

Figure 1: Details of the MoEs and feature projectors  $\psi^{\text{chr}}$ ,  $\psi^{\text{det-g}}$  in the proposed Rainmer.

## A OVERVIEW

In this supplementary material, we first present details of the MoEs and two feature projectors:  $\psi^{\text{chr}}$  and  $\psi^{\text{det-g}}$  in the proposed Rainmer (Appendix B). Subsequently, we conduct in-depth investigations of the multi-view representations for image deraining and AllinOne image restoration (Appendix C). Furthermore, we analytically quantify the relationships among different datasets, which offers insights into understanding dataset cooperation, competition, and conflicts.

## B ARCHITECTURE OF MOES AND FEATURE PROJECTORS

**MoEs.** As stated in our paper, we implement the mixture of experts (MoEs) the same as [1]. Specifically, given an input image  $x$ , we first expand the channels to 48 with a convolutional layer as shown in Fig. 1. This process results in a shallow feature  $F^{\text{sha}}$ . With the help of MoEs, the shallow feature  $F^{\text{sha}}$  is further transferred into  $F^{\text{spa}}$ :

$$F^{\text{spa}} = f_{\text{MoEs}}(F^{\text{sha}}), \quad (1)$$

where  $f_{\text{MoEs}}$  denotes the function of MoEs.

Typically, MoEs comprises four stages of mixture of expert interaction. Each stage contains eight experts [1]: an average pooling with kernel size  $3 \times 3$ , depth convolutional layers with kernel size  $1 \times 1$ ,  $3 \times 3$ ,  $5 \times 5$ ,  $7 \times 7$ , and dilation convolutional layers with kernel size  $3 \times 3$ ,  $5 \times 5$ ,  $7 \times 7$ . These eight experts are expected to extract rich information to well perceive details, degradations, and illuminations. Except for expert learning modules, MoEs utilizes a weights generation module as shown in Fig. 1 to adjust responses corresponding to each expert. The weights  $T^s, s \in \{1, 2, 3, 4\}$  for all four stages are generated from the same feature  $F^{\text{spa}}$ :

$$[T^1, T^2, T^3, T^4] = \mathcal{G} \circ \text{GAP}(F^{\text{spa}}), \quad (2)$$

where  $\mathcal{G}$  represents a GAP-Conv-ReLU-Conv weights generation module and GAP is the global average pooling operation. Notably,

each weight  $T^s \in \mathbb{R}^8$  characterizes the response to eight experts in the  $s$ -th stage. Denote  $F^{s-1}$  as the output feature from  $(s-1)$ -th stage, then the  $s$ -th stage outputs:

$$F^s = f_{\text{ReLU}} \left( f_{\text{Conv}} \left( T^s \odot \text{cat}(f_{\text{exp}}(F^{s-1})) \right) + F^{s-1} \right), \quad s = 2, 3, 4 \quad (3)$$

$$F^1 = F^{\text{spa}}, \quad (4)$$

where  $f_{\text{exp}}$  indicates the function of eight experts,  $\text{cat}$  is the concatenation operation,  $f_{\text{Conv}}$  denotes a  $1 \times 1$  convolutional layer,  $f_{\text{ReLU}}$  is the ReLU activation, and  $\odot$  means element-wise multiplication with broadcasting.

**Feature Projectors.** The feature extracted by the MoEs contains rich channel and spatial information that facilitates the perception of image details, degradations, and illuminations. Therefore, we further employ feature projectors to project the feature obtained from MoEs into specific representation spaces. As shown in Fig. 1, we employ a chromatic projector and a detail/degradation projector to obtain corresponding representations. Each projector contains a residual block with two squeeze-and-excitation layers [3] to facilitate channel interaction.

## C MULTI-VIEW REPRESENTATION ANALYSIS

In this section, we provide an in-depth analysis to investigate the effect of multi-view representations in image deraining, as well as AllinOne image restoration.

### C.1 Image Deraining

To train models on amalgamated Rain13K (*synthetic*), GT-Rain (*real-world*), and GTAV-balance (*nighttime*) datasets, we proposed to extract multi-view representations. Specifically, the detail/degradation representation is responsible for capturing image details and degradations (rain streaks, noise, blur, etc.), while the chromatic representation is introduced to perceive illuminations and color distortions caused by rain veiling effects. Hence, images with specific

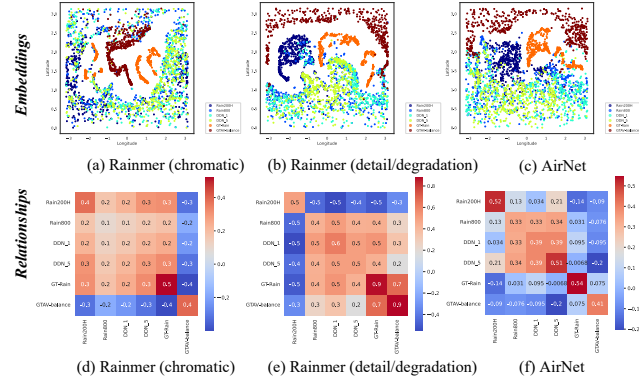

**Figure 2: Visualization of multi-view representations and dataset relationships among image deraining datasets.**

degradation factors and illuminations represent different relationships in different representation spaces, according to their similarity in detail/degradation or illumination. To investigate this hypothesis, we visualize multi-view representations among different datasets using the UMAP [6] technique. Specifically, we choose images from synthetic datasets (Rain200H [9], Rain800 [10], DDN [2]), real-world dataset (GT-Rain), and nighttime dataset (GTAV-balance) for visualization. Since rainy images in DDN contain 14 rain types, we select the first type (light rain) and fifth type (thick rain) and denote them as DDN\_1 and DDN\_5. We choose Rain200H, Rain800, and DDN because they all contribute to the synthetic dataset Rain13K. As for visualization, we randomly choose 500 rainy images from these datasets. Note that the representations lie in a high dimensional spherical surface, hence we utilize UMAP to project representations into a 2D longitudinal space (in another way, spherical coordinate system  $(r, \theta, \phi)$  with  $r = 1$ ) following [8].

Fig. 2 (a) & (b) display the embeddings of Rain200H, Rain800, DDN\_1, DDN\_5, GT-Rain, and GTAV-balance in chromatic and detail/degradation representation space, respectively. It can be seen that datasets represent different embeddings in different spaces. Specifically, in chromatic space, the GT-Rain and GTAV-balance datasets are mainly isolated from other synthetic datasets, owing to the color distortions in GT-Rain and low illuminance in GTAV-balance. However, in detail/degradation space, Rain200H and GT-Rain are nearly isolated from other datasets, due to extremely heavy rain streaks in Rain200H and complex real-world degradations in GT-Rain. In summary, the visualization results indicate that the proposed contrastive learning method successfully learned chromatic and detail/degradation representations. Additionally, we further visualize the embedding space learned by AirNet [4], a degradation-based contrastive learning method where images from different datasets are assigned with different degradation factors. The result is shown in Fig. 2 (c), which demonstrates a less compact space compared to Rainmer in Fig. 2 (b). Typically, Rain200H is mixed with other datasets in Fig. 2 (c).

In addition to visualizations of embeddings, these representations enable us to quantify the relationships among datasets, where dataset cooperation and conflict could be investigated. To this end,

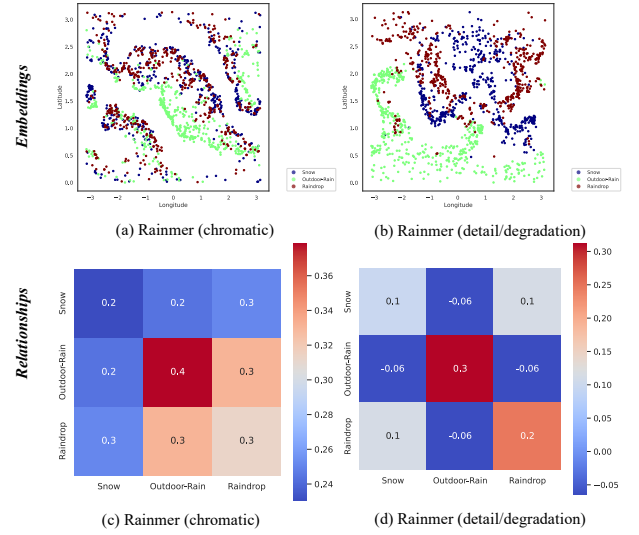

**Figure 3: Visualization of multi-view representations and dataset relationships among snow, rain, and raindrop datasets.**

we further compute the relationship score between two arbitrary datasets by averaging cosine similarities of representations obtained across these datasets. The results are presented in Fig. 2 (d)-(f). As shown in Fig. 2 (d), GTAV-balance represents a negative relationship to other datasets, indicating the influence of illumination intensity. Moreover, the other datasets all share positive relationships, contributing to the cooperation of learning on daytime datasets. The result in Fig. 2 (e) provides different dataset relationships, where Rain200H shares negative relationships with other datasets while the remaining datasets represent deep cooperation. These cooperations contribute to the outstanding performances of the proposed Rainmer. In contrast, AirNet has learned worse dataset relationships where dataset conflicts between GT-Rain / GTAV-balance and synthetic datasets exist, demonstrating the poor performance of AirNet.

Both the visualizations of embeddings and quantitative dataset relationships have demonstrated the superiority of the proposed method.

## C.2 Allinone Image Restoration

We further follow Appendix C.1 to visualize learned embeddings on the AllinOne dataset. Similarly, we randomly choose 500 images from the snow, rain, and raindrop subset in AllWeather [5] for visualization. The results are presented in Fig. 3. In the chromatic space, both Fig. 3 (a) & (c) display positive relationships among different datasets. However, Fig. 3 (b) & (d) demonstrate that degradation factors of snow, rain, and raindrop are quite different, resulting in negative relationships, the same as observed in [4, 7].

## REFERENCES

- [1] Xiang Chen, Hao Li, Mingqiang Li, and Jinshan Pan. 2023. Learning A Sparse Transformer Network for Effective Image Deraining. In *Proceedings of the IEEE Conference on Computer Vision and Pattern Recognition*. 5896–5905.

- [2] Xueyang Fu, Jiabin Huang, Delu Zeng, Yue Huang, Xinghao Ding, and John Paisley. 2017. Removing rain from single images via a deep detail network. In *Proceedings of the IEEE Conference on Computer Vision and Pattern Recognition*. 3855–3863.
- [3] Jie Hu, Li Shen, and Gang Sun. 2018. Squeeze-and-excitation networks. In *IEEE Conference on Computer Vision and Pattern Recognition*. 7132–7141.
- [4] Boyun Li, Xiao Liu, Peng Hu, Zhongqin Wu, Jiancheng Lv, and Xi Peng. 2022. All-in-one image restoration for unknown corruption. In *Proceedings of the IEEE Conference on Computer Vision and Pattern Recognition*. 17452–17462.
- [5] Ruoteng Li, Robby T Tan, and Loong-Fah Cheong. 2020. All in one bad weather removal using architectural search. In *IEEE Conference on Computer Vision and Pattern Recognition*. 3175–3185.
- [6] Leland McInnes, John Healy, and James Melville. 2018. Umap: Uniform manifold approximation and projection for dimension reduction. *arXiv preprint arXiv:1802.03426* (2018).
- [7] Vaishnav Potlapalli, Syed Waqas Zamir, Salman Khan, and Fahad Shahbaz Khan. 2023. Promptir: Prompting for all-in-one blind image restoration. *Advances in Neural Information Processing Systems* 36 (2023).
- [8] Wu Ran, Peirong Ma, Zhiqian He, Hao Ren, and Hong Lu. 2024. Harnessing joint rain-/detail-aware representations to eliminate intricate rains. In *International Conference on Learning Representations*.
- [9] Wenhan Yang, Robby T Tan, Jiashi Feng, Jiaying Liu, Zongming Guo, and Shuicheng Yan. 2017. Deep joint rain detection and removal from a single image. In *Proceedings of the IEEE Conference on Computer Vision and Pattern Recognition*. 1357–1366.
- [10] He Zhang, Vishwanath Sindagi, and Vishal M Patel. 2019. Image de-raining using a conditional generative adversarial network. *IEEE Transactions on Circuits and Systems for Video Technology* 30, 11 (2019), 3943–3956.

291  
292  
293  
294  
295  
296  
297  
298  
299  
300  
301  
302  
303  
304  
305  
306  
307  
308  
309  
310  
311  
312  
313  
314  
315  
316  
317  
318  
319  
320  
321  
322  
323  
324  
325  
326  
327  
328  
329  
330  
331  
332  
333  
334  
335  
336  
337  
338  
339  
340  
341  
342  
343  
344  
345  
346  
347  
348
